# Supplementary material for: The antidiabetic drug metformin aids bacteria in hijacking vitamin B12 from the environment through RcdA
Source: PubMed Central journal article supplement (PMC9873799; doi:10.1038/s42003-023-04475-0), 2023-01-24
Supplement: 42003_2023_4475_MOESM3_ESM.pdf [file 42003_2023_4475_MOESM3_ESM.pdf]

## Notes of additional supplementary files

**File name:** Supplementary Data 1

**Description:** The outcomes of the primary screen

**File name:** Supplementary Data 2

**Description:** The information of composition for axenic culture medium

**File name:** Supplementary data 3

**Description:** The primers used in this study

**File name:** Supplementary data 4

**Description:** The source data for figures presented in the paper
